# Supplementary material
Source: publisher figshare collection journal article supplement (https://acs.figshare.com/ndownloader/files/4769731)
Supplement: Supplementary file 1 [file 4769731]

# **High-Nuclearity Manganese and Iron Complexes with the Anionic Ligand Methyl Salicylimidate**

*Meenal D. Godbole,<sup>†</sup> Olivier Roubeau,<sup>‡</sup> Allison M. Mills,<sup>§</sup> Huub Kooijman,<sup>§</sup> Anthony L. Spek,<sup>§</sup> and Elisabeth Bouwman<sup>\*†</sup>*

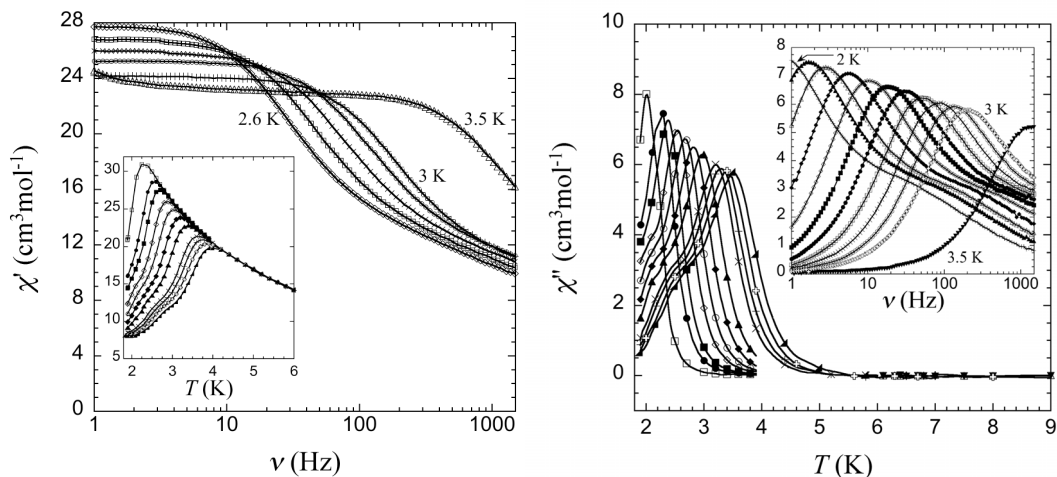

**Figure S1:** Plot of  $\chi'$  and  $\chi''$  vs.  $\nu$  and  $T$  under 0 T dc field for complex **4** (selected frequencies in the range 1 to 1488 Hz).

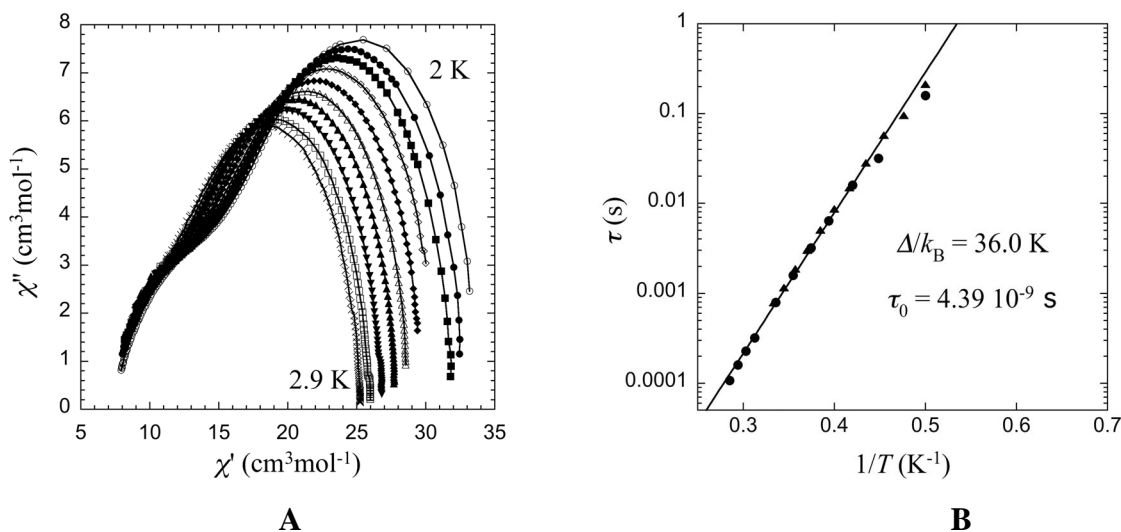

**Figure S2:** **A:** Cole-Cole plots for complex **4** in the temperature range 2-2.9 K; **B:** Plot of  $\tau$  vs.  $T^{-1}$  determined by ac measurements (full circles: temperature data, full triangles: frequency data). The solid line represents the Arrhenius fit.
